# Supplementary material for: Development of Gold Nanoparticle-Based SERS Substrates on TiO2-Coating to Reduce the Coffee Ring Effect
Source: MDPI journal article supplement (doi:10.3390/nano12050860), 2022-03-03
Supplement: s1 [file s1]

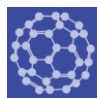

Supplementary Material

# Development of Gold Nanoparticle-Based SERS Substrates on TiO<sub>2</sub>-Coating to Reduce the Coffee Ring Effect

René Breuch <sup>1,\*</sup>, Daniel Klein <sup>1</sup>, Cassandra Moers <sup>1</sup>, Eleni Siefke <sup>1</sup>, Claudia Wickleder <sup>2</sup> and Peter Kaul <sup>1,\*</sup>

<sup>1</sup> Institute of Safety and Security Research, University of Applied Sciences Bonn-Rhein-Sieg, von-Liebig-Str. 20, 53359 Rheinbach, Germany; daniel.klein@h-brs.de (D.K.); cassandra.moers@h-brs.de (C.M.); eleni.siefke@h-brs.de (E.S.)

<sup>2</sup> Inorganic Chemistry, Department Chemie und Biologie, Cμ - Center for Micro- and Nanochemistry and (Bio)Technology, Faculty of Science and Technology, University of Siegen, Adolf-Reichwein-Str., 57068 Siegen, Germany, wickleder@chemie.uni-siegen.de

\* Correspondence: rene.breuch@h-brs.de (R.B.); peter.kaul@h-brs.de (P.K.)

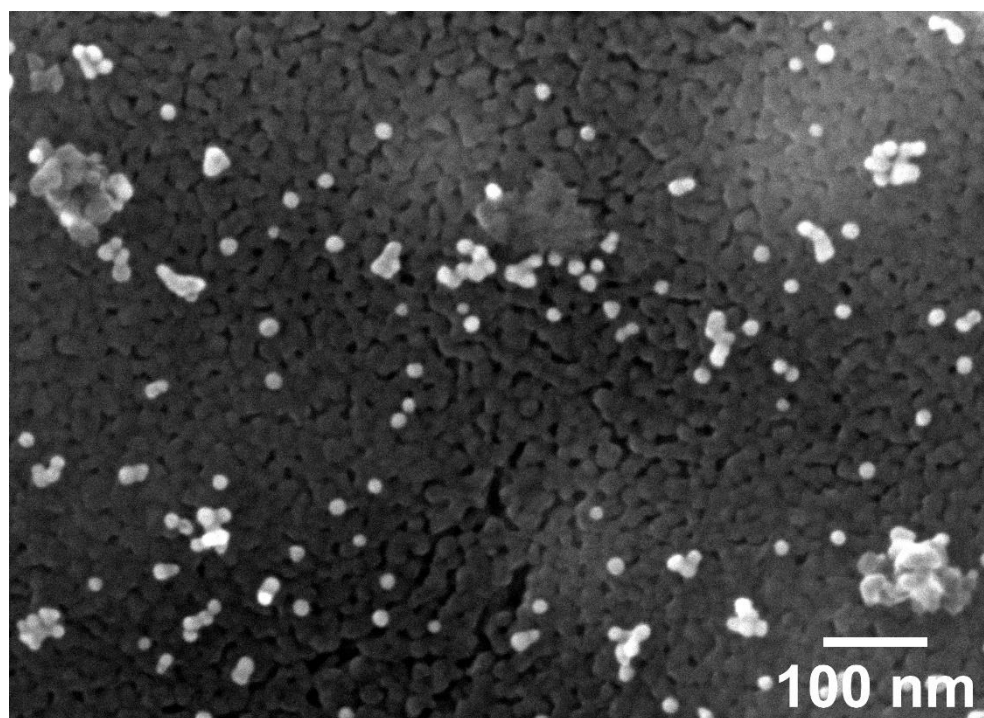

**Figure S1.** High resolution SEM image of AuNPs onto a SERS-substrate coated with 4% TTIP and sintered at 600 °C a 100,000× magnification with a WD 6 mm and 15 kV acceleration voltage.

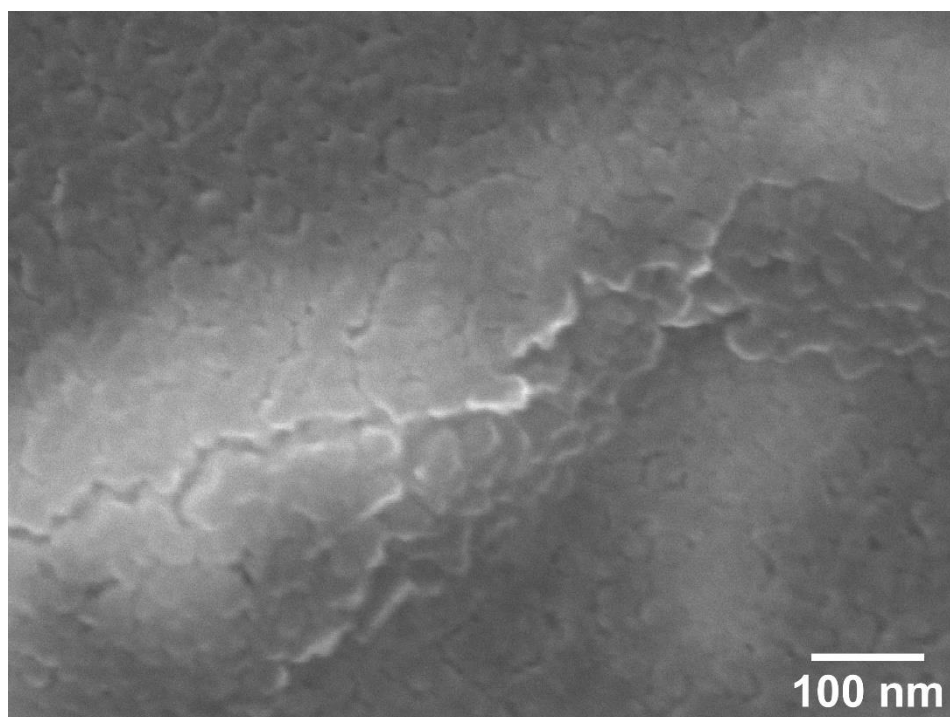

**Figure S2.** High resolution SEM image of a substrate with 4% TTIP and sintered at 600 °C without AuNPs at 100,000 $\times$  magnification with a WD 7,5 mm and 15 kV acceleration voltage.
